# Supplementary material for: The absence of murine cathelicidin-related antimicrobial peptide impacts host responses enhancing Salmonella enterica serovar Typhimurium infection
Source: Springer Nature journal article supplement (doi:10.1186/s13099-020-00386-1), 2020-11-13
Supplement: MOESM1 [file 18585438]

## Supplemental material

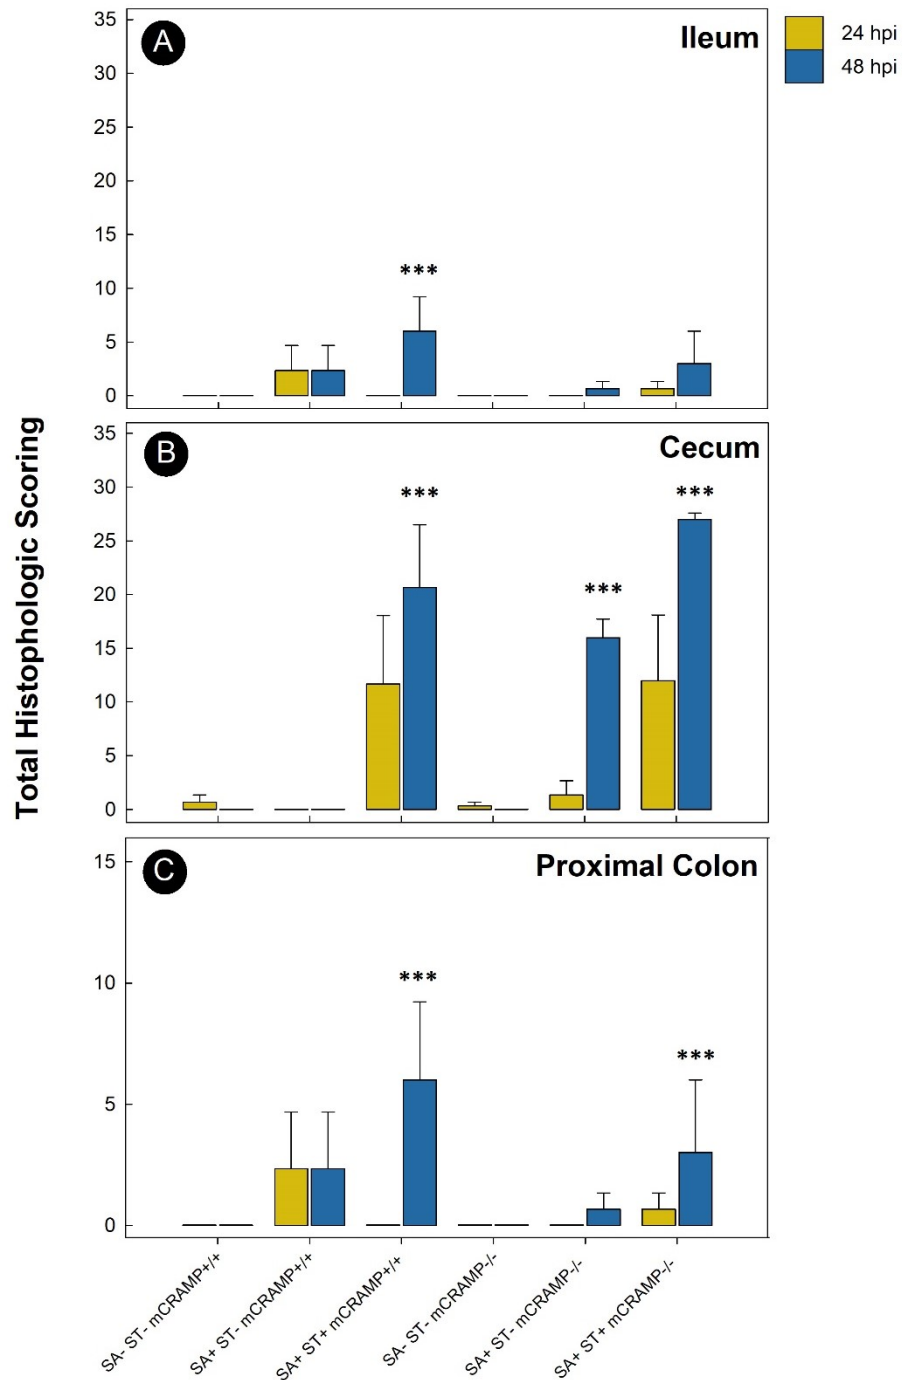

**Fig S1** Total histopathologic scores in mCRAMP<sup>-/-</sup> and mCRAMP<sup>+/+</sup> mice that were inoculated with *Salmonella enterica* Typhimurium (SA+) or medium alone (SA-), and pre-treated with streptomycin (ST+) or water alone (ST-) at 24 vs 48 hours post-inoculation. (A) Ileum; (B) Cecum; (C) Proximal Colon. Vertical lines associated with markers are standard errors of the mean. Histogram bars with asterisks indicate that treatments differ (\*\*\*) P < 0.001).

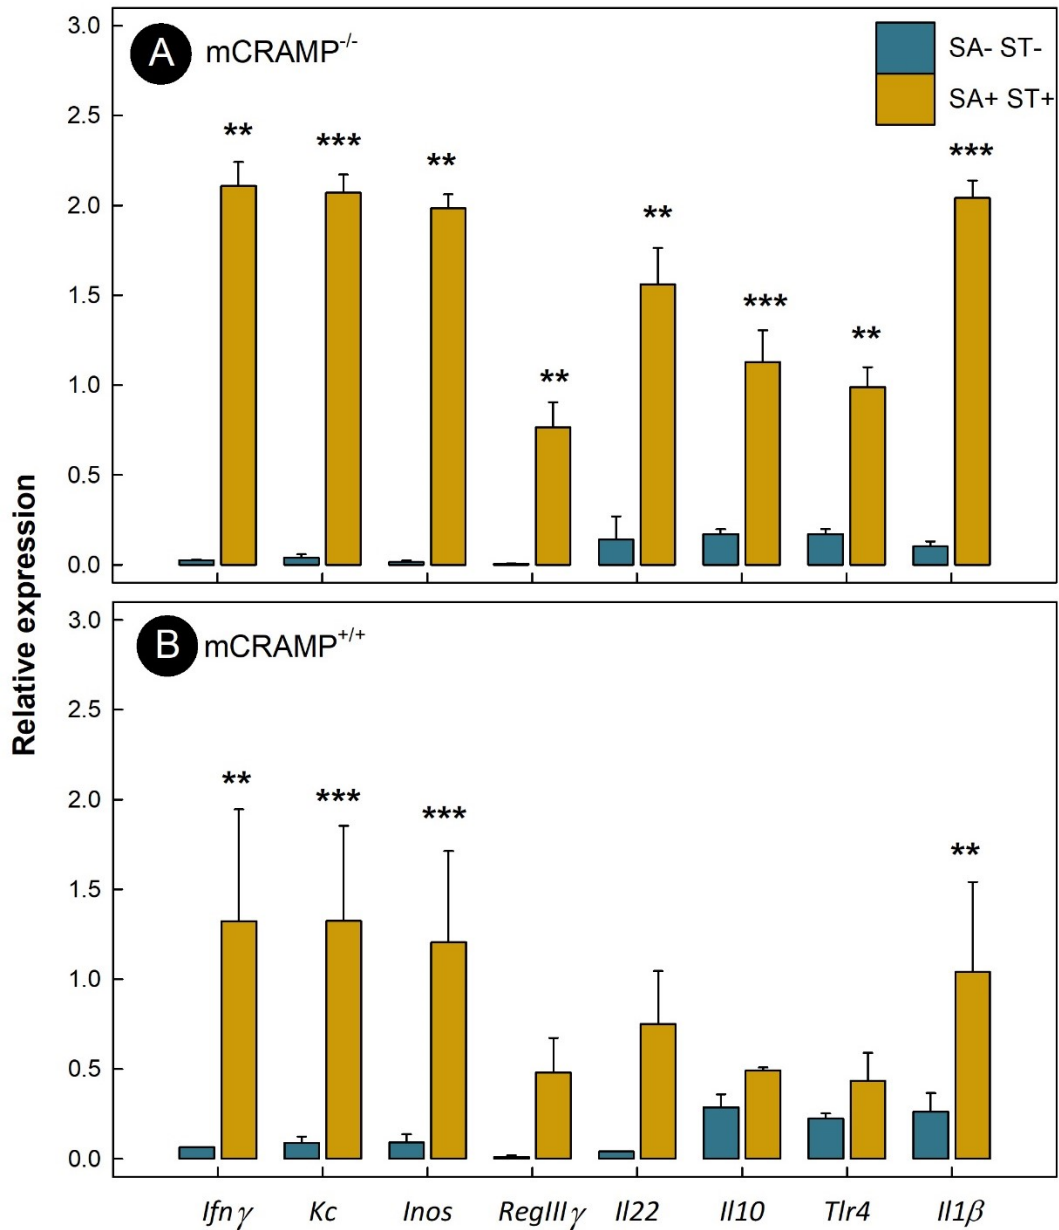

**Fig S2** Relative gene expression in cecum of mCRAMP<sup>+/+</sup> and mCRAMP<sup>-/-</sup> mice that were inoculated with *Salmonella enterica* Typhimurium (SA+) or medium alone (SA-) and pretreated with streptomycin (ST+) or water alone (ST-) at 48 hours post-inoculation. (A) mCRAMP<sup>-/-</sup> (B) mCRAMP<sup>+/+</sup>. Vertical lines associated with markers are standard errors of the mean. Histogram bars with asterisks indicate that treatments differ (\*P<0.050, \*\*P<0.010).

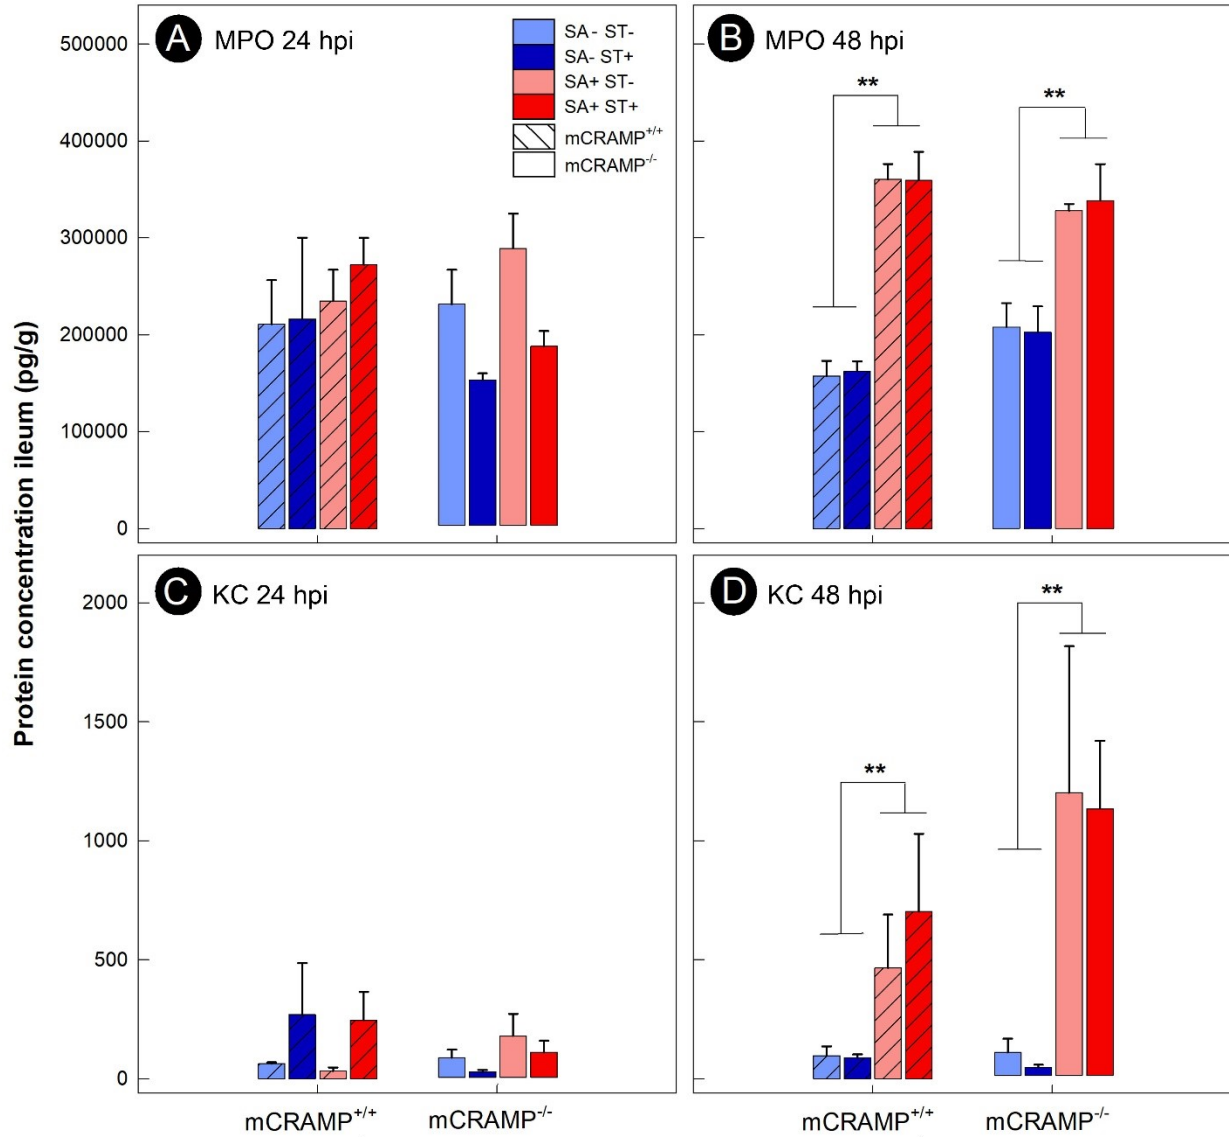

**Fig S3** Protein concentrations of MPO and KC in the ileum of mCRAMP<sup>+/+</sup> and mCRAMP<sup>-/-</sup> mice that were orally inoculated with *Salmonella enterica* Typhimurium (SA+) or medium alone (SA-), and pretreated with streptomycin (ST+) or water alone (ST-). (A) MPO at 24 hours post-inoculation (hpi); (B) MPO at 48 hpi; (C) KC at 24 hpi; (D) KC at 48 hpi. Vertical lines associated with markers are standard errors of the mean. Histogram bars with asterisks indicate that treatments differ (\*P<0.050, \*\*P<0.010, \*\*\*P<0.001).

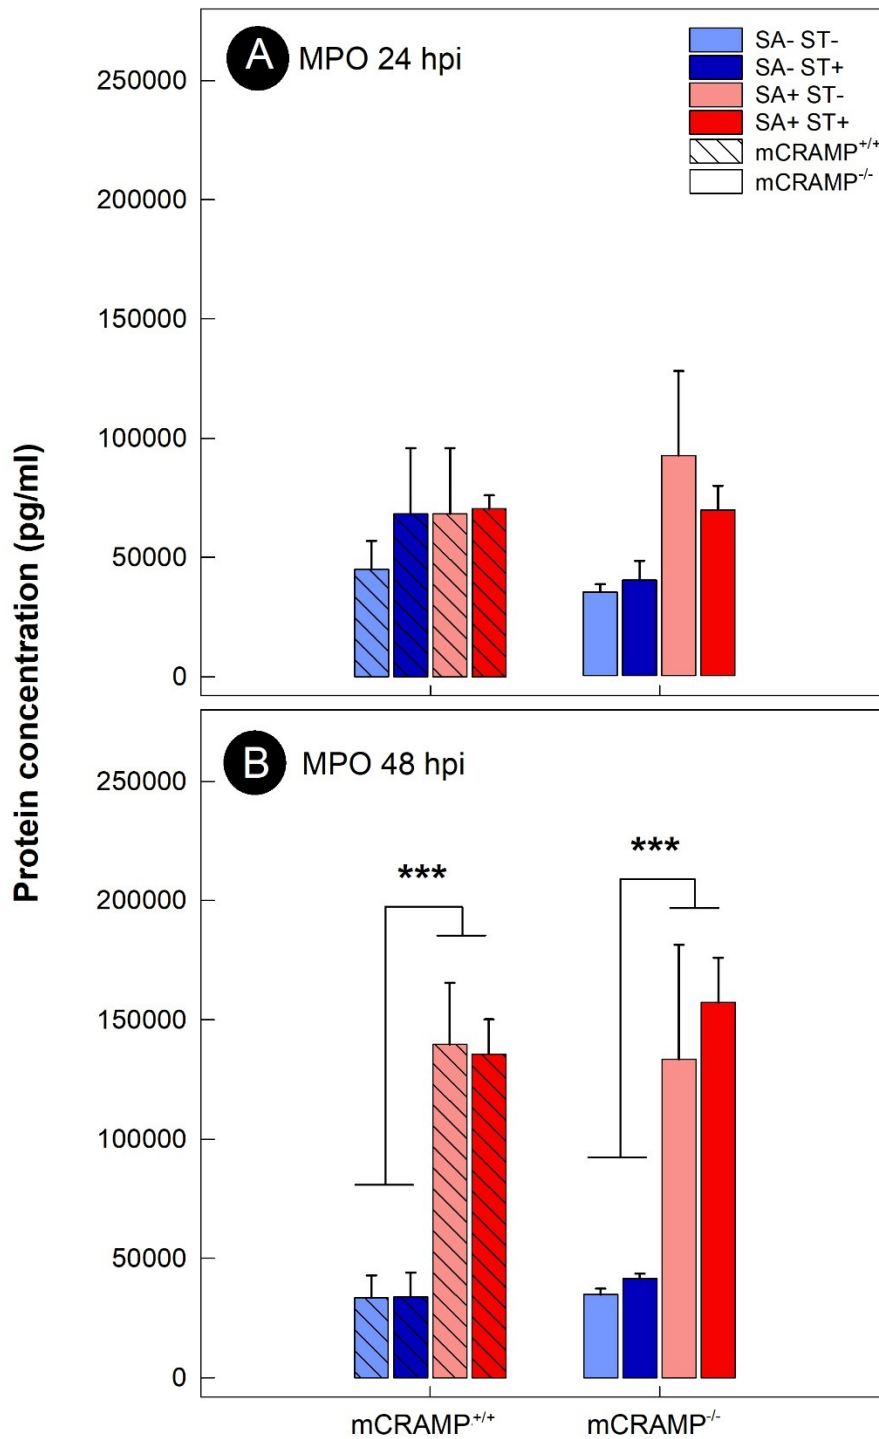

**Fig S4** Protein concentrations of MPO in the serum of mCRAMP<sup>+/+</sup> and mCRAMP<sup>-/-</sup> mice that were orally inoculated with *Salmonella enterica* Typhimurium (SA+) or medium alone (SA-), and pretreated with streptomycin (ST+) or water alone (ST-). (A) MPO at 24 hours post-inoculation (hpi); (B) MPO at 48 hpi. Vertical lines associated with markers are standard errors of the mean. Histogram bars with asterisks indicate that treatments differ (\*P<0.050, \*\*P<0.010, \*\*\*P<0.001).

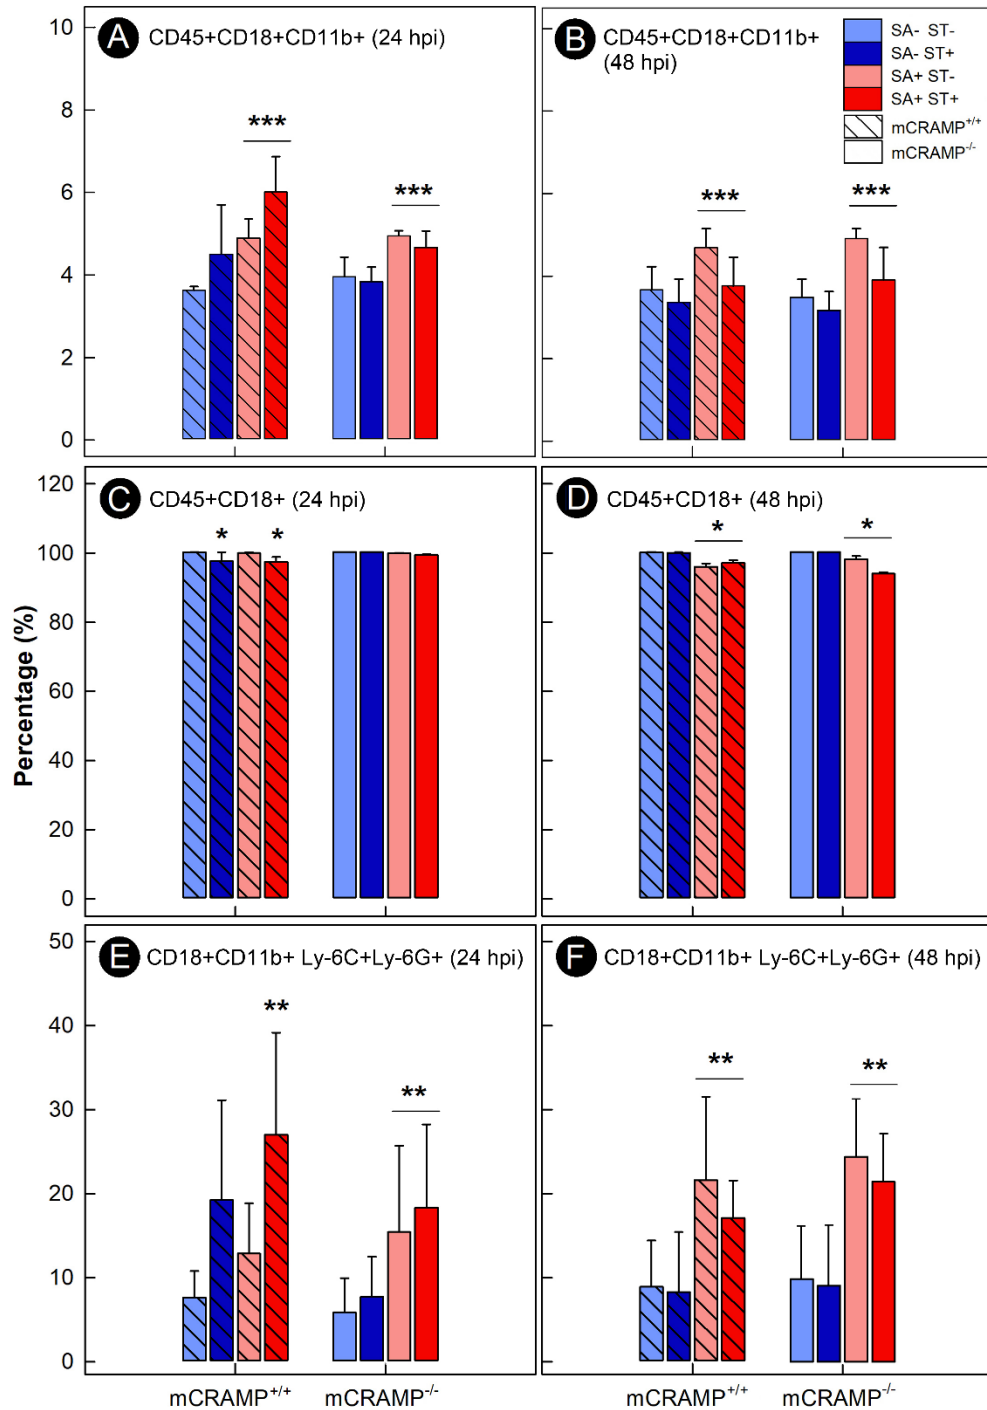

**FIG S5** Percentage of splenic immune cell populations in mCRAMP<sup>-/-</sup> and mCRAMP<sup>+/+</sup> mice, that were orally inoculated with *Salmonella enterica* Typhimurium (SA+) or medium alone (SA-), and pretreated with streptomycin (ST+) or water alone (ST-). (A) CD45<sup>+</sup>CD18<sup>+</sup>CD11b<sup>+</sup> leukocytes at 24 hours post-inoculation (hpi); (B) CD45<sup>+</sup>CD18<sup>+</sup>CD11b<sup>+</sup> leukocytes at 48 hpi; (C) CD45<sup>+</sup>CD18<sup>+</sup> leukocytes at 24 hpi; (D) CD45<sup>+</sup>CD18<sup>+</sup> leukocytes at 48 hpi; (E) CD18<sup>+</sup>CD11b<sup>+</sup> Ly-6C<sup>+</sup>Ly-6G<sup>+</sup> neutrophils at 24 hpi; (F) CD18<sup>+</sup>CD11b<sup>+</sup> Ly-6C<sup>+</sup>Ly-6G<sup>+</sup> neutrophils at 48 hpi. Vertical lines associated with markers are standard errors of the mean. Histogram bars with asterisks indicate that treatments differ (\*P<0.050, \*\*P<0.010, \*\*\*P<0.001).

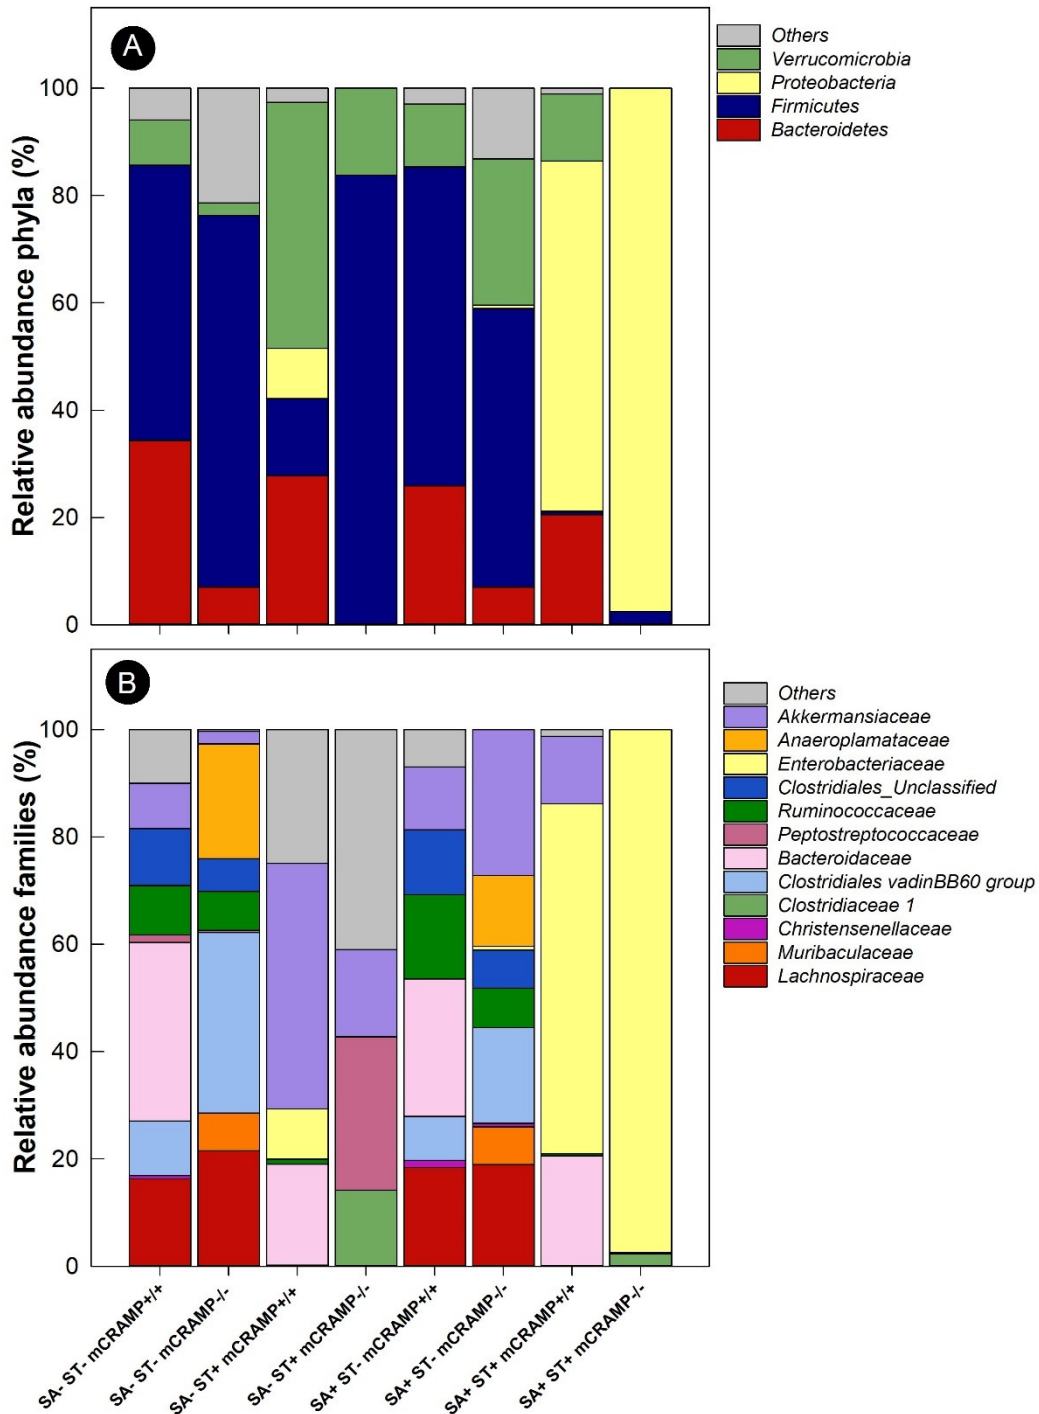

**FIG S6** Relative abundance (%) of bacterial phyla and families in cecum digesta of mCRAMP<sup>+/+</sup> and mCRAMP<sup>-/-</sup> mice that were orally inoculated with *Salmonella enterica* Typhimurium (SA+) or medium alone (SA-), and pretreated with streptomycin (ST+) or water (ST-) alone at 48 hours post-inoculation. (A) Phyla; (B) Families.

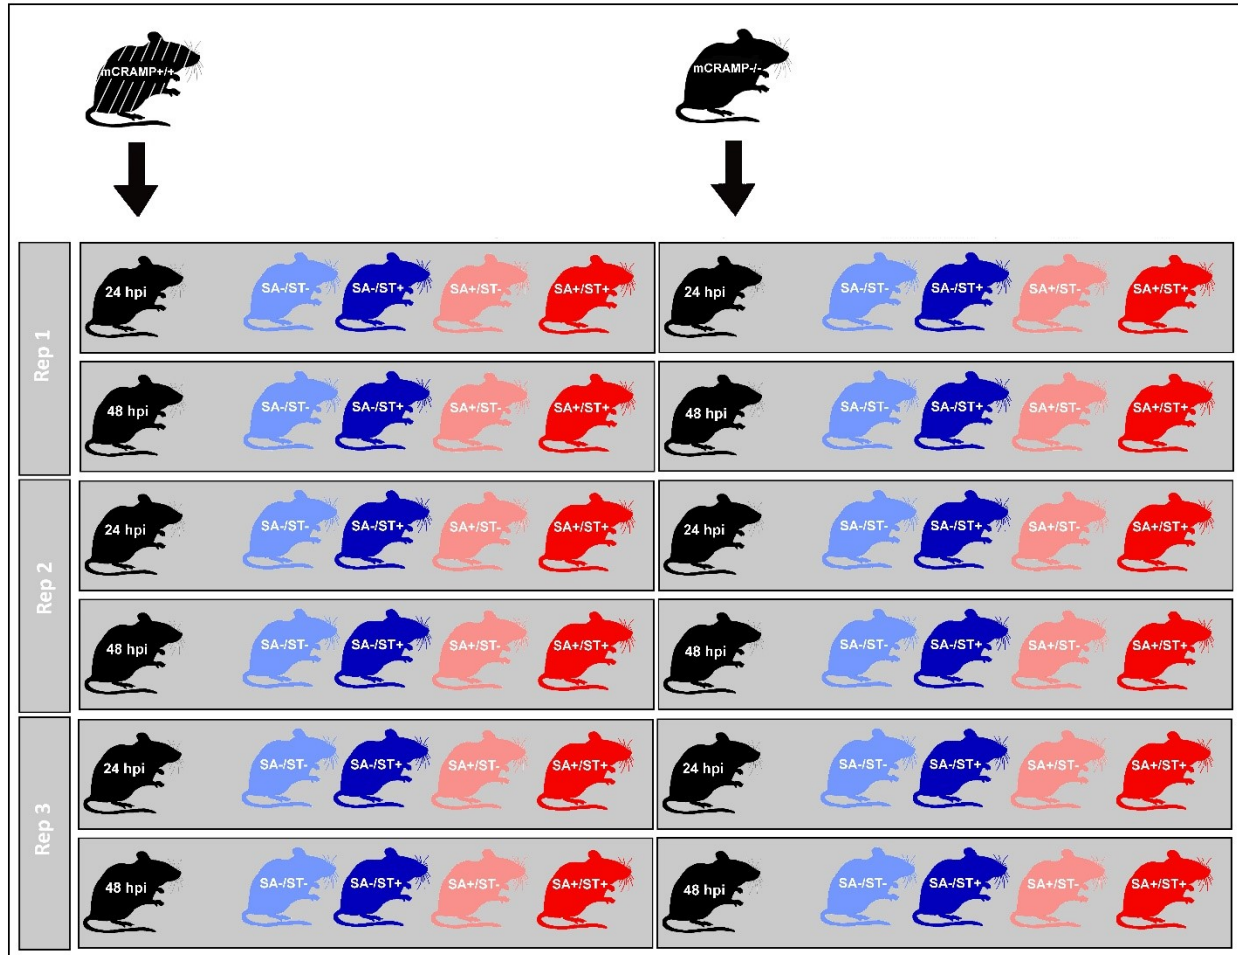

**FIG S7** Schematic representation of the experimental design. The experiment was arranged as a two ( $\pm$  mCRAMP) by two ( $\pm$  *Salmonella*) by two ( $\pm$  streptomycin) by two (sample time) factorial experiment. The experiment was run on three separate occasions, and comprised 48 mice in total. The figure represents only one replicate.

**Table S1** Splenic immune cell populations at 48 hours post-inoculation.

| Cell phenotype                                                                                                         | mCRAMP <sup>+/+</sup> |      |         |      |         |      |         |      | mCRAMP <sup>-/-</sup> |      |         |      |         |      |         |      |
|------------------------------------------------------------------------------------------------------------------------|-----------------------|------|---------|------|---------|------|---------|------|-----------------------|------|---------|------|---------|------|---------|------|
|                                                                                                                        | ST- SA-               |      | ST+ SA- |      | ST- SA+ |      | ST+ SA+ |      | ST- SA-               |      | ST+ SA- |      | ST- SA+ |      | ST+ SA+ |      |
|                                                                                                                        | Mean                  | SEM  | Mean    | SEM  | Mean    | SEM  | Mean    | SEM  | Mean                  | SEM  | Mean    | SEM  | Mean    | SEM  | Mean    | SEM  |
| CD3 <sup>+</sup> T cells (% of live lymphocytes)                                                                       | 1.21                  | 0.2  | 1.45    | 0.39 | 1.59    | 0.28 | 1.55    | 0.36 | 0.94                  | 0.3  | 0.76    | 0.06 | 1.16    | 0.14 | 0.97    | 0.09 |
| CD4 <sup>+</sup> T helper cells (% of CD3 <sup>+</sup> cells)                                                          | 38.0                  | 6.15 | 44.3    | 1.05 | 43.7    | 5.08 | 52.0    | 8.47 | 42.36                 | 5.24 | 49.33   | 9.70 | 45.96   | 7.87 | 53.13   | 5.34 |
| CD8 <sup>+</sup> cytotoxic T cells (% of CD3 <sup>+</sup> cells)                                                       | 3.4                   | 1.20 | 2.42    | 0.55 | 4.10    | 1.44 | 4.20    | 0.92 | 4.88                  | 2.57 | 4.04    | 1.60 | 5.06    | 1.91 | 5.43    | 1.76 |
| CD3 <sup>+</sup> CD4 <sup>+</sup> TCR <sup>+</sup> γδ T cells (% of CD4 <sup>+</sup> cells)                            | 90.9                  | 0.68 | 87.9    | 1.96 | 94.0    | 2.70 | 94.6    | 0.77 | 89.26                 | 2.23 | 89.90   | 1.70 | 91.56   | 3.73 | 93.93   | 0.56 |
| IL-23R <sup>+</sup> γδ T cells (% of CD4 <sup>+</sup> TCR <sup>+</sup> cells)                                          | 43.5                  | 12.7 | 32.0    | 15.1 | 34.3    | 16.7 | 24.2    | 10.1 | 34.6                  | 13.1 | 34.9    | 7.3  | 29.73   | 10.8 | 17.3    | 8.27 |
| CD3 <sup>+</sup> CD161 <sup>+</sup> NK cells (% of live CD3 <sup>+</sup> cells)                                        | 4.00                  | 0.30 | 3.06    | 0.18 | 3.16    | 0.34 | 2.46    | 0.14 | 3.72                  | 0.18 | 3.56    | 0.11 | 3.48    | 0.49 | 3.03    | 0.34 |
| CD3 <sup>+</sup> CD11b <sup>+</sup> CD11c <sup>-</sup> monocytes (% of live CD3 <sup>+</sup> CD161 <sup>-</sup> cells) | 0.10                  | 0.07 | 0.86    | 0.64 | 0.21    | 0.11 | 0.35    | 0.30 | 0.11                  | 0.08 | 0.07    | 0.05 | 0.94    | 0.89 | 0.66    | 0.56 |
| CD3 <sup>+</sup> CD11b <sup>+</sup> CD11c <sup>+</sup> mDC (% of live CD3 <sup>+</sup> CD161 <sup>-</sup> cells)       | 0.17                  | 0.12 | 0.20    | 0.09 | 0.13    | 0.08 | 0.10    | 0.07 | 0.14                  | 0.11 | 0.16    | 0.13 | 0.10    | 0.05 | 0.10    | 0.06 |
| CD3 <sup>+</sup> CD11b <sup>+</sup> CD11c <sup>+</sup> pDC (% of live CD3 <sup>+</sup> CD161 <sup>-</sup> cells)       | 0.20                  | 0.03 | 0.19    | 0.01 | 0.26    | 0.04 | 0.29    | 0.11 | 6.10                  | 5.95 | 0.15    | 0.04 | 0.27    | 0.13 | 0.22    | 0.03 |
| CD68 <sup>+</sup> macrophages (% of CD11b <sup>+</sup> CD11c <sup>+</sup> cells)                                       | 0.16                  | 0.12 | 0.10    | 0.07 | 0.13    | 0.08 | 0.20    | 0.09 | 0.14                  | 0.10 | 0.16    | 0.13 | 0.09    | 0.05 | 0.10    | 0.06 |

pDC, plasmacytoid dendritic cells; mDC, myeloid dendritic cells.



**Table S2** P values for Alpha and Beta Diversity measurements.

| Treatments |         | Alpha Diversity   |               |             | Beta Diversity   |
|------------|---------|-------------------|---------------|-------------|------------------|
|            |         | Pielou's evenness | Faith's index | ASVs counts | UniFrac weighted |
| 24 hpi     | SA- ST- | 0.563             | 0.248         | 0.248       | 0.201            |
|            | SA- ST+ | 0.512             | 0.055         | 0.126       | 0.511            |
|            | SA+ ST- | 0.512             | 0.017         | 0.049       | 0.003            |
|            | SA+ ST+ | 0.049             | 0.126         | 0.275       | 0.306            |
| 48 hpi     | SA- ST- | 0.512             | 0.126         | 0.126       | 0.100            |
|            | SA- ST+ | 0.827             | 0.055         | 0.268       | 0.222            |
|            | SA+ ST- | 0.563             | 0.017         | 0.563       | 0.003            |
|            | SA+ ST+ | 0.512             | 0.827         | 0.512       | 0.587            |

**Table S3** Histopathologic scoring system

| Score | Inflammatory cell infiltrate        |                                    | Epithelial changes                                                                           |                  |                                                                                                                | Mucosal architecture |                  |
|-------|-------------------------------------|------------------------------------|----------------------------------------------------------------------------------------------|------------------|----------------------------------------------------------------------------------------------------------------|----------------------|------------------|
|       | Severity                            | Extent                             | Hyperplasia                                                                                  | Goblet cell loss | Epithelial injury                                                                                              | Irregular crypt*     | Crypt loss       |
| 0     | normal                              | normal                             | normal                                                                                       | normal           | none                                                                                                           | –                    | normal           |
| 1     | Minimal: <10%                       | Mucosal                            | Minimal: <25%                                                                                | Minimal <20%     | rare (i.e. < 10 surface epithelial cells shedding)                                                             | –                    | decrease of <10% |
| 2     | Mild: 10-25%; scattered neutrophils | Mucosal and submucosal             | Mild: 25-35%                                                                                 | Mild 21-35%      | mild (i.e. focal epithelial erosions; 11-50 surface epithelial cells shedding)                                 | –                    | decrease of ≥10% |
| 3     | Moderate: 26-50%                    | Mucosal, submucosal and transmural | Moderate: 36-50%; mitoses in middle/upper third of crypt epithelium, distant from crypt base | Moderate 36-50%  | moderate (i.e. multi focal surface epithelium erosion; < 50 of surface epithelial cells shedding)              | –                    |                  |
| 4     | Marked: >51%; dense infiltrate      | –                                  | Marked: >51%; mitoses in upper third of crypt epithelium, distant from crypt base            | Marked >50%      | severe (i.e. multi focal to coalescing surface epithelium erosions; >50 of surface epithelial cells shedding). | Yes                  |                  |
| 5     | –                                   | –                                  |                                                                                              |                  |                                                                                                                | Yes                  |                  |

\*Non-parallel crypts, variable crypt diameters, bifurcation and branched crypts
